# Supplementary material for: Reduced telomere length in embryos exposed to predator cues
Source: Oxford University Press journal article supplement (doi:10.1242/jeb.216176), 2019-01-01
Supplement: jeb216176supp.pdf [file jeb216176supp.pdf]

**Table S1.** Summary of linear models (LMs) and generalised linear models (GLMs) for initial differences in laying date, egg volume, sex-ratio and hatching success. All models include the experimental treatment, year and their two-way interaction as fixed factor. The two-way interaction between the experimental treatment and year was never significant and therefore, removed from full models (Laying date:  $F_{1,83}=0.010$ ,  $P=0.922$ ; Egg volume:  $F_{1,83}=0.098$ ,  $P=0.754$ ; sex-ratio: Wald  $\chi^2=0.512$ ,  $DF=1$ ,  $P=0.474$ ; hatching success: Wald  $\chi^2=1.042$ ,  $DF=1$ ,  $P=0.307$ ). Significant terms are highlighted in bold.

|                  | Source of variation   | Estimate | DF   | F or Wald $\chi^2$  | P                 |
|------------------|-----------------------|----------|------|---------------------|-------------------|
| Laying date      | Intercept             | 4359.221 |      |                     |                   |
|                  | Treatment (unexposed) | -0.018   | 1,84 | 0.006               | 0.932             |
|                  | Year (2018)           | -732.804 | 1,84 | 97.83e <sup>3</sup> | <b>P&lt;0.001</b> |
| Egg volume       | Intercept             | 84.123   |      |                     |                   |
|                  | Treatment (unexposed) | 0.272    | 1,84 | 0.026               | 0.872             |
|                  | Year (2018)           | 0.257    | 1,84 | 0.022               | 0.882             |
| Sex-ratio        | Intercept             | 0.058    |      |                     |                   |
|                  | Treatment (unexposed) | 0.163    | 1    | 0.130               | 0.719             |
|                  | Year (2018)           | -0.264   | 1    | 0.321               | 0.571             |
| Hatching success | Intercept             | -2.198   |      |                     |                   |
|                  | Treatment (unexposed) | -0.227   | 1    | 0.102               | 0.749             |
|                  | Year (2018)           | 0.227    | 1    | 0.093               | 0.761             |

**Table S2.** Summary of final sample sizes used in the statistical analyses. Differences in sample sizes reflect missing values owing to the death or loss of chicks and/or insufficient volume sample.

|                         | 2018      |         | 2019      |         | Total |
|-------------------------|-----------|---------|-----------|---------|-------|
|                         | unexposed | exposed | unexposed | exposed |       |
| Egg volume              | 27        | 27      | 16        | 17      | 87    |
| Plasma corticosterone   | 23        | 22      | 12        | 14      | 71    |
| Telomere length (day 1) | 22        | 23      | 13        | 15      | 73    |
| Telomere length (day 5) | 20        | 20      | 12        | 12      | 64    |
| Body mass (day 1)       | 24        | 23      | 13        | 16      | 76    |
| Body mass (day 5)       | 20        | 20      | 14        | 14      | 68    |

**Table S3.** Summary of linear models for the effect of embryo treatment [unexposed vs exposed] and covariates on telomere length and body mass in gull chicks at day 1 and 5 of age. The two- and three-way interactions between the experimental treatment, age and year were never significant and therefore, removed from full models [Telomere length model: treatment x age;  $F_{1,66.32}=1.270$ ,  $P=0.264$ ; treatment x year:  $F_{1,13.29}=0.293$ ,  $P=0.597$ ; age x year:  $F_{1,65.56}=0.008$ ,  $P=0.930$ ; treatment x age x year:  $F_{1,64.46}=0.154$ ,  $P=0.696$ ; Body mass model: treatment x age:  $F_{1,73.82}=1.177$ ,  $P=0.281$ ; treatment x year:  $F_{1,71.59}=0.399$ ,  $P=0.529$ ; age x year;  $F_{1,72.78}=0.747$ ,  $P=0.390$ ; treatment x age x year:  $F_{1,71.63}=1.993$ ,  $P=0.162$ ). Significant terms are highlighted in bold.

| Source of variation   | Telomere length |                   |        |              | Body mass |                   |         |                  |
|-----------------------|-----------------|-------------------|--------|--------------|-----------|-------------------|---------|------------------|
|                       | Estimate        | DF <sub>n,d</sub> | F or Z | P            | Estimate  | DF <sub>n,d</sub> | F or Z  | P                |
| Intercept             | 0.782           |                   |        |              | 37.239    |                   |         |                  |
| Treatment (unexposed) | 0.080           | 1,11.77           | 5.534  | <b>0.037</b> | 3.640     | 1,72.50           | 2.713   | 0.104            |
| Sex (female)          | -0.044          | 1,66.52           | 2.629  | 0.110        | -3.476    | 1,72.98           | 2.327   | 0.131            |
| Year (2018)           | 0.060           | 1,66.47           | 2.567  | 0.157        | 4.125     | 1,72.17           | 3.286   | 0.074            |
| Age (day 1)           | -0.012          | 1,67.41           | 0.455  | 0.502        | 41.984    | 1,74.79           | 435.953 | <b>&lt;0.001</b> |
| Egg volume            | 0.002           | 1,68.80           | 1.501  | 0.225        | 0.766     | 1,78.97           | 23.794  | <b>&lt;0.001</b> |
| <i>Random effects</i> |                 |                   |        |              |           |                   |         |                  |
| Incubator ID          | 0.001           |                   | 0.800  | 0.423        | 0*        |                   | -       | 1                |
| Chick ID              | 0.006           |                   | 2.656  | 0.008        | 16.200    |                   | 0.856   | 0.392            |

\*Parameter estimate bound at zero; hence, no Z was estimated.
